# Supplementary material for: Reaction-controlled assemblies and structural diversities of seven Co(ii)/Cu(ii) complexes based on a bipyridine-dicarboxylate N-oxide ligand
Source: Royal Society of Chemistry journal article supplement (doi:10.1039/c4ce02008a), 2014-10-30
Supplement: c4ce02008a1.pdf [file c4ce02008a1.pdf]

## **Electronic Supplementary Information**

### **Reaction Controlled Assemblies and Structural Diversities of Seven Co(II)/Cu(II) Complexes Based on a Bipyridine-dicarboxylate N-oxide Ligand**

Quan-Quan Li, Yi-Fan Kang, Chun-Yan Ren, Guo-Ping Yang, Qing Liu, Ping Liu\* and Yao-Yu Wang

*Key Laboratory of Synthetic and Natural Functional Molecule Chemistry of the Ministry of Education, Shaanxi Key Laboratory of Physico-Inorganic Chemistry, College of Chemistry & Materials Science, Northwest University, Xi'an 710069, P. R. China*

E-mail: [liuping@nwu.edu.cn](mailto:liuping@nwu.edu.cn)

**Table S1** Crystallographic data and structure refinement parameters for complexes **1-5**

| complex                                                                                               | <b>1</b>                                                        | <b>2</b>                                                       | <b>3</b>                                                                       | <b>4</b>                                                                       | <b>5</b>                                                                       |
|-------------------------------------------------------------------------------------------------------|-----------------------------------------------------------------|----------------------------------------------------------------|--------------------------------------------------------------------------------|--------------------------------------------------------------------------------|--------------------------------------------------------------------------------|
| chemical formula                                                                                      | C <sub>14</sub> H <sub>11</sub> CoN <sub>3</sub> O <sub>8</sub> | C <sub>12</sub> H <sub>8</sub> CuN <sub>2</sub> O <sub>7</sub> | C <sub>48</sub> H <sub>28</sub> Cu <sub>2</sub> N <sub>8</sub> O <sub>12</sub> | C <sub>48</sub> H <sub>48</sub> Cu <sub>2</sub> N <sub>8</sub> O <sub>22</sub> | C <sub>44</sub> H <sub>40</sub> Cu <sub>2</sub> N <sub>8</sub> O <sub>18</sub> |
| formula weight                                                                                        | 408.17                                                          | 355.74                                                         | 1035.86                                                                        | 1216.02                                                                        | 1095.92                                                                        |
| crystal shape                                                                                         | columnar                                                        | block                                                          | columnar                                                                       | block                                                                          | block                                                                          |
| crystal color                                                                                         | red                                                             | bright green                                                   | blue                                                                           | blue                                                                           | blue                                                                           |
| temperature (K)                                                                                       | 296(2)                                                          | 296(2)                                                         | 296(2)                                                                         | 296(2)                                                                         | 296(2)                                                                         |
| crystal system                                                                                        | Monoclinic                                                      | Monoclinic                                                     | Monoclinic                                                                     | Triclinic                                                                      | Triclinic                                                                      |
| space group                                                                                           | <i>C2/m</i>                                                     | <i>P2(1)/n</i>                                                 | <i>P2(1)/n</i>                                                                 | <i>P-1</i>                                                                     | <i>P-1</i>                                                                     |
| <i>a</i> /Å                                                                                           | 14.462(2)                                                       | 5.8488(13)                                                     | 9.3276(10)                                                                     | 9.213(2)                                                                       | 9.357(4)                                                                       |
| <i>b</i> /Å                                                                                           | 15.486(3)                                                       | 16.227(4)                                                      | 11.9664(13)                                                                    | 12.190(3)                                                                      | 11.325(5)                                                                      |
| <i>c</i> /Å                                                                                           | 7.4899(12)                                                      | 13.164(3)                                                      | 19.099(2)                                                                      | 12.635(3)                                                                      | 12.540(5)                                                                      |
| $\alpha$ (°)                                                                                          | 90                                                              | 90                                                             | 90                                                                             | 109.362(4)                                                                     | 64.338(6)                                                                      |
| $\beta$ (°)                                                                                           | 96.971(3)                                                       | 91.507(3)                                                      | 92.947(2)                                                                      | 109.077(4)                                                                     | 69.757(6)                                                                      |
| $\gamma$ (°)                                                                                          | 90                                                              | 90                                                             | 90                                                                             | 91.212(4)                                                                      | 75.003(6)                                                                      |
| <i>V</i> /Å <sup>3</sup>                                                                              | 1665.0(5)                                                       | 1249.0(5)                                                      | 2128.9(4)                                                                      | 1251.8(5)                                                                      | 1114.4(8)                                                                      |
| <i>Z</i>                                                                                              | 4                                                               | 4                                                              | 2                                                                              | 1                                                                              | 1                                                                              |
| density (mg/m <sup>3</sup> )                                                                          | 1.620                                                           | 1.892                                                          | 1.616                                                                          | 1.613                                                                          | 1.633                                                                          |
| $\mu$ (mm <sup>-1</sup> )                                                                             | 1.080                                                           | 1.790                                                          | 1.078                                                                          | 0.944                                                                          | 1.044                                                                          |
| <i>F</i> (000)                                                                                        | 820                                                             | 716.0                                                          | 1052                                                                           | 626                                                                            | 562                                                                            |
| reflections collected                                                                                 | 4251                                                            | 6642                                                           | 10555                                                                          | 6190                                                                           | 5612                                                                           |
| <i>R</i> <sub>int</sub>                                                                               | 0.0504                                                          | 0.0335                                                         | 0.0463                                                                         | 0.0212                                                                         | 0.0247                                                                         |
| number of parameters                                                                                  | 129                                                             | 199                                                            | 316                                                                            | 361                                                                            | 325                                                                            |
| Goodness-of-fit on <i>F</i> <sup>2</sup>                                                              | 1.075                                                           | 1.075                                                          | 1.002                                                                          | 1.052                                                                          | 1.028                                                                          |
| <i>R</i> <sub>1</sub> <sup>a</sup> , <i>wR</i> <sub>2</sub> <sup>b</sup> [ <i>I</i> > 2σ( <i>I</i> )] | 0.0642, 0.1755                                                  | 0.0408, 0.1228                                                 | 0.0410, 0.0877                                                                 | 0.0450, 0.1330                                                                 | 0.0559, 0.1634                                                                 |
| <i>R</i> <sub>1</sub> , <i>wR</i> <sub>2</sub> (all data)                                             | 0.0897, 0.1940                                                  | 0.0656, 0.1756                                                 | 0.0659, 0.0978                                                                 | 0.0538, 0.1567                                                                 | 0.0741, 0.2373                                                                 |

$$^a R_1 = \sum ||F_o| - |F_c|| / \sum |F_o|; \quad ^b wR_2 = [\sum w(F_o^2 - F_c^2)^2 / \sum w(F_o^2)]^{1/2}$$

**Table S2** The selected bond lengths (Å) and angles (°) for complexes **1-5**.

---

| <b>1</b>            |           |                     |           |
|---------------------|-----------|---------------------|-----------|
| Co(1)-O(2)#1        | 2.080(4)  | Co(1)-O(2)#2        | 2.080(4)  |
| Co(1)-O(2)#3        | 2.080(4)  | Co(1)-O(2)          | 2.080(4)  |
| Co(1)-O(4)          | 2.138(5)  | Co(1)-O(4)#1        | 2.138(5)  |
| Co(2)-O(3)          | 2.075(4)  | Co(2)-O(3)#4        | 2.075(4)  |
| Co(2)-O(3)#5        | 2.075(4)  | Co(2)-O(3)#6        | 2.075(4)  |
| Co(2)-N(1)          | 2.115(8)  | Co(2)-N(1)#4        | 2.115(8)  |
| O(2)#1-Co(1)-O(2)#2 | 90.6(3)   | O(2)#1-Co(1)-O(2)#3 | 89.4(3)   |
| O(2)#2-Co(1)-O(2)#3 | 180       | O(2)#1-Co(1)-O(2)   | 180       |
| O(2)#2-Co(1)-O(2)   | 89.4(3)   | O(2)#3-Co(1)-O(2)   | 90.6(3)   |
| O(2)#1-Co(1)-O(4)   | 92.48(2)  | O(2)#2-Co(1)-O(4)   | 87.52(2)  |
| O(2)#3-Co(1)-O(4)   | 92.48(2)  | O(2)-Co(1)-O(4)     | 87.52(2)  |
| O(2)#1-Co(1)-O(4)#1 | 87.52(2)  | O(2)#2-Co(1)-O(4)#1 | 92.48(2)  |
| O(2)#3-Co(1)-O(4)#1 | 87.52(2)  | O(2)-Co(1)-O(4)#1   | 92.48(2)  |
| O(4)-Co(1)-O(4)#1   | 180       | O(3)-Co(2)-O(3)#4   | 180       |
| O(3)-Co(2)-O(3)#5   | 93.6(2)   | O(3)#4-Co(2)-O(3)#5 | 86.4(2)   |
| O(3)-Co(2)-O(3)#6   | 86.4(2)   | O(3)#4-Co(2)-O(3)#6 | 93.6(2)   |
| O(3)#5-Co(2)-O(3)#6 | 180       | O(3)-Co(2)-N(1)     | 95.31(2)  |
| O(3)#4-Co(2)-N(1)   | 84.69(2)  | O(3)#5-Co(2)-N(1)   | 95.31(2)  |
| O(3)#6-Co(2)-N(1)   | 84.69(2)  | O(3)-Co(2)-N(1)#4   | 84.69(2)  |
| O(3)#4-Co(2)-N(1)#4 | 95.31(2)  | O(3)#5-Co(2)-N(1)#4 | 84.69(2)  |
| O(3)#6-Co(2)-N(1)#4 | 95.31(2)  | N(1)-Co(2)-N(1)#4   | 180       |
| <b>2</b>            |           |                     |           |
| Cu(1)-O(3)#1        | 1.929(4)  | Cu(1)-O(6)#2        | 1.973(3)  |
| Cu(1)-O(5)#2        | 1.974(3)  | Cu(1)-O(1)          | 1.977(3)  |
| Cu(1)-O(7)          | 2.363(5)  |                     |           |
| O(3)#1-Cu(1)-O(6)#2 | 90.86(2)  | O(3)#1-Cu(1)-O(5)#2 | 158.55(2) |
| O(6)#2-Cu(1)-O(5)#2 | 90.57(2)  | O(3)#1-Cu(1)-O(1)   | 88.75(2)  |
| O(6)#2-Cu(1)-O(1)   | 177.36(2) | O(5)#2-Cu(1)-O(1)   | 90.75(2)  |
| O(3)#1-Cu(1)-O(7)   | 108.09(2) | O(6)#2-Cu(1)-O(7)   | 87.17(2)  |
| O(5)#2-Cu(1)-O(7)   | 93.36(2)  | O(1)-Cu(1)-O(7)     | 90.47(2)  |
| <b>3</b>            |           |                     |           |
| Cu(1)-O(1)          | 1.933(2)  | Cu(1)-O(2)          | 2.645(3)  |
| Cu(1)-O(3)#1        | 1.954(2)  | Cu(1)-O(4)#1        | 2.585(2)  |
| Cu(1)-N(3)          | 2.000(3)  | Cu(1)-N(4)          | 2.005(3)  |
| O(1)-Cu(1)-O(3)#1   | 91.72(9)  | O(1)-Cu(1)-N(3)     | 172.85(1) |
| O(3)#1-Cu(1)-N(3)   | 93.88(1)  | O(1)-Cu(1)-N(4)     | 93.61(1)  |

---

|                   |           |                    |           |
|-------------------|-----------|--------------------|-----------|
| O(3)#1-Cu(1)-N(4) | 167.25(1) | N(3)-Cu(1)-N(4)    | 81.83(1)  |
| <b>4</b>          |           |                    |           |
| Cu(1)-O(1)        | 1.929(3)  | Cu(1)-O(2)         | 2.856(3)  |
| Cu(1)-O(4)#1      | 1.961(2)  | Cu(1)-N(4)         | 2.005(3)  |
| Cu(1)-N(3)        | 2.027(3)  | Cu(1)-O(1W)        | 2.439(3)  |
| O(1)-Cu(1)-O(4)#1 | 91.21(1)  | O(1)-Cu(1)-N(4)    | 175.37(1) |
| O(4)#1-Cu(1)-N(4) | 92.71(1)  | O(1)-Cu(1)-N(3)    | 94.60(1)  |
| O(4)#1-Cu(1)-N(3) | 165.02(1) | N(4)-Cu(1)-N(3)    | 82.20(1)  |
| O(1)-Cu(1)-O(1W)  | 90.19(1)  | O(4)#1-Cu(1)-O(1W) | 94.16(1)  |
| N(4)-Cu(1)-O(1W)  | 87.06(1)  | N(3)-Cu(1)-O(1W)   | 99.61(1)  |
| <b>5</b>          |           |                    |           |
| Cu(1)-O(1)        | 1.945(4)  | Cu(1)-O(3)#1       | 1.961(4)  |
| Cu(1)-N(4)        | 1.997(4)  | Cu(1)-N(3)         | 2.022(4)  |
| Cu(1)-O(1W)       | 2.420(4)  | Cu(1)-O(2)         | 2.797(6)  |
| O(1)-Cu(1)-O(3)#1 | 90.94(2)  | O(1)-Cu(1)-N(4)    | 170.91(2) |
| O(3)#1-Cu(1)-N(4) | 93.65(2)  | O(1)-Cu(1)-N(3)    | 94.34(2)  |
| O(3)#1-Cu(1)-N(3) | 173.58(2) | N(4)-Cu(1)-N(3)    | 80.63(2)  |
| O(1)-Cu(1)-O(1W)  | 92.06(2)  | O(3)#1-Cu(1)-O(1W) | 93.31(2)  |
| N(4)-Cu(1)-O(1W)  | 95.50(2)  | N(3)-Cu(1)-O(1W)   | 90.15(2)  |

Symmetry codes: For **1**, #1  $-x, -y+1, -z+1$ ; #2  $x, -y+1, z$ ; #3  $-x, y, -z+1$ ; #4  $-x, -y, -z$ ; #5  $x, -y, z$ ; #6  $-x, y, -z$ . For **2**, #1  $x+1, y, z$ ; #2  $x+1/2, -y+1/2, z+1/2$ . For **3**, #1  $-x+2, -y+1, -z+2$ ; For **4**, #1  $-x+1, -y, -z$ ; For **5**, #1  $-x+1, -y+1, -z+1$ .

**Table S3** Hydrogen bond geometries in the crystal structure of **1-5**.

| D-H...A             | D-H  | H...A | D...A(Å)  | D-H...A(°) |
|---------------------|------|-------|-----------|------------|
| <b>1</b>            |      |       |           |            |
| C(4)-H(4)···O(1)#1  | 0.93 | 2.42  | 3.146(7)  | 135        |
| C(8)-H(8A)···O(4)#2 | 0.96 | 2.54  | 3.356(17) | 142        |
| <b>2</b>            |      |       |           |            |
| O(7)-H(7A)···O(2)#1 | 0.86 | 2.39  | 3.160(7)  | 150        |
| O(7)-H(7B)···O(1)   | 0.86 | 2.47  | 3.093(6)  | 130        |
| O(7)-H(7B)···O(2)   | 0.86 | 1.90  | 2.704(8)  | 156        |
| <b>3</b>            |      |       |           |            |
| C(1)-H(1)···O(6)#1  | 0.93 | 2.19  | 2.927(4)  | 136        |
| C(2)-H(2)···O(4)#2  | 0.93 | 2.57  | 3.376(3)  | 145        |
| C(9)-H(9)···O(5)#3  | 0.93 | 2.25  | 3.095(4)  | 150        |

|                       |      |      |          |     |
|-----------------------|------|------|----------|-----|
| C(18)–H(18)···O(2)#4  | 0.93 | 2.40 | 2.995(5) | 121 |
| <b>4</b>              |      |      |          |     |
| O(1W)–H(1A)···O(5)#1  | 0.86 | 1.89 | 2.711(6) | 160 |
| O(1W)–H(1B)···O(3W)   | 0.85 | 2.13 | 2.983(6) | 179 |
| O(2W)–H(2A)···O(2)    | 0.86 | 2.03 | 2.888(5) | 179 |
| O(2W)–H(2B)···O(4W)#2 | 0.86 | 2.05 | 2.908(7) | 178 |
| O(3W)–H(3A)···O(3)#3  | 0.86 | 1.94 | 2.801(5) | 179 |
| O(3W)–H(3B)···O(5)#4  | 0.85 | 1.85 | 2.698(6) | 179 |
| O(4W)–H(4A)···O(6)#3  | 0.87 | 1.90 | 2.772(6) | 179 |
| O(4W)–H(4B)···O(3W)   | 0.85 | 2.08 | 2.925(6) | 178 |
| O(5W)–H(5A)···O(3)#5  | 0.85 | 1.91 | 2.760(7) | 180 |
| O(5W)–H(5B)···O(1W)#6 | 0.85 | 2.15 | 2.995(9) | 180 |
| C(8)–H(8)···O(4W)#6   | 0.93 | 2.39 | 3.312(7) | 170 |
| C(22)–H(22)···O(1W)#6 | 0.93 | 2.52 | 3.376(6) | 154 |
| <b>5</b>              |      |      |          |     |
| O(1W)–H(1WA)···O(4)#1 | 0.86 | 2.14 | 2.717(7) | 124 |
| O(1W)–H(1WB)···O(5)#2 | 0.86 | 2.18 | 2.828(7) | 133 |
| O(2W)–H(2A)···O(2)    | 0.86 | 2.00 | 2.852(8) | 178 |
| O(2W)–H(2B)···O(3W)   | 0.86 | 1.97 | 2.829(8) | 179 |
| O(3W)–H(3A)···O(6)#3  | 0.85 | 1.97 | 2.818(8) | 180 |
| O(3W)–H(3B)···O(4)    | 0.85 | 2.08 | 2.930(8) | 180 |
| C(8)–H(8)···O(6)#4    | 0.93 | 2.25 | 3.172(8) | 169 |
| C(19)–H(19)···O(2W)#5 | 0.93 | 2.31 | 3.175(7) | 155 |

Symmetry codes: For **1**, #1  $1/2+x, 1/2-y, z$ ; #2  $1/2-x, -1/2+y, 1-z$ . For **2**, #1  $-x+2, -y+1, -z+2$ . For **3**, #1  $3/2-x, 1/2+y, 3/2-z$ ; #2  $-1+x, y, z$ ; #3  $5/2-x, -1/2+y, 3/2-z$ ; #4  $2-x, -y, 2-z$ ; For **4**, #1  $-x+1, -y, -z$ ; #2  $x, y, z-1$ ; #3  $x+1, y, z+1$ ; #4  $x, y, z+1$ ; #5  $x+1, y+1, z+1$ ; #6  $-x+1, -y+1, -z+1$ . For **5**, #1  $-x+1, -y+1, -z+1$ ; #2  $x, y+1, z$ ; #3  $x-1, y, z$ ; #4  $2-x, 1-y, -z$ ; #5  $1-x, 2-y, -z$ .

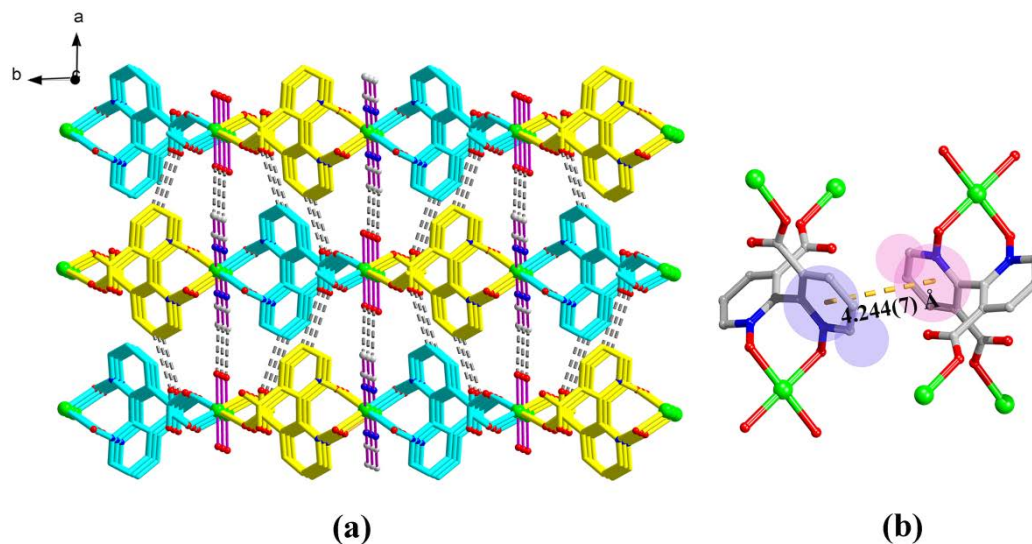

**Fig. S1** (a) A view of the 3D supramolecular network of complex **1** constructed through hydrogen bonds (C-H $\cdots$ O) and (b) the weak  $\pi$ - $\pi$  stacking interactions between the adjacent 2D layers. The broken lines are on behalf of the hydrogen bonds and  $\pi$  $\cdots$  $\pi$  interactions, and the hydrogen atoms are omitted for clarity.

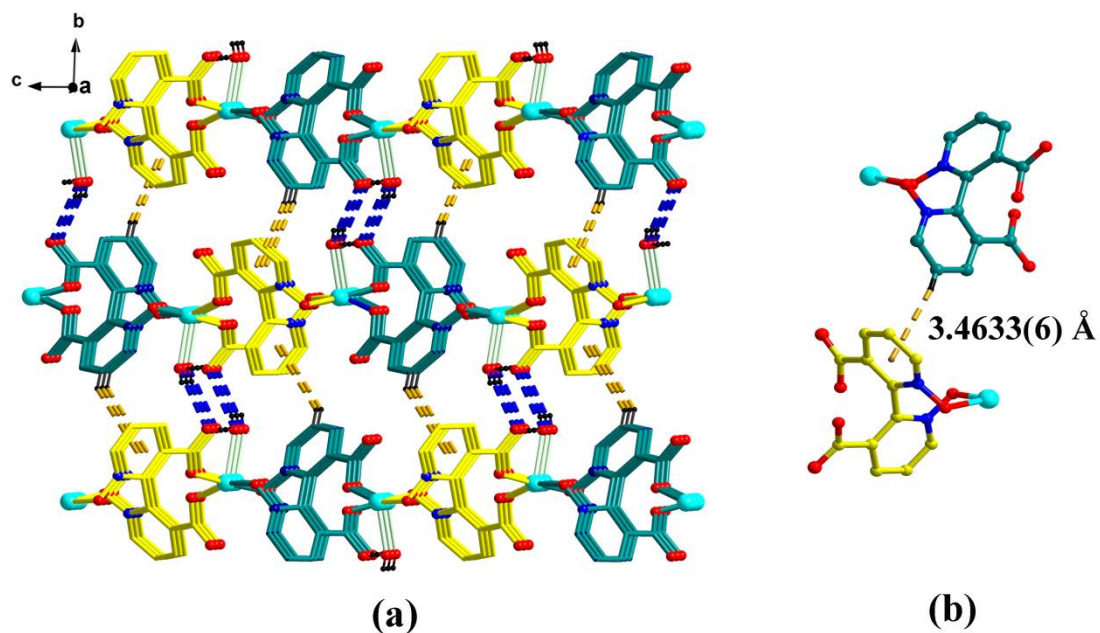

**Fig. S2** (a) A view of the 3D supramolecular network of complex **2** constructed through hydrogen bonds (O-H $\cdots$ O) and (b) C-H $\cdots$  $\pi$  interactions between the adjacent 2D layers. The broken lines are on behalf of the hydrogen bonds and C-H $\cdots$  $\pi$  interactions, and the hydrogen atoms are omitted for clarity.

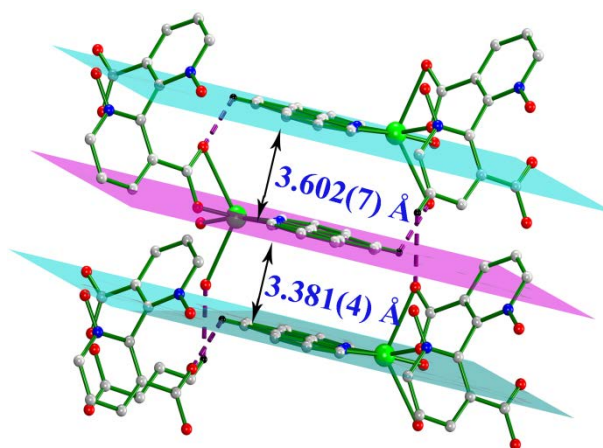

**Fig. S3** The  $\pi$ - $\pi$  stacking interactions can be observed in the 2D layers of complex **3**. The broken lines are on behalf of the hydrogen bonds, and the hydrogen atoms are omitted for clarity.

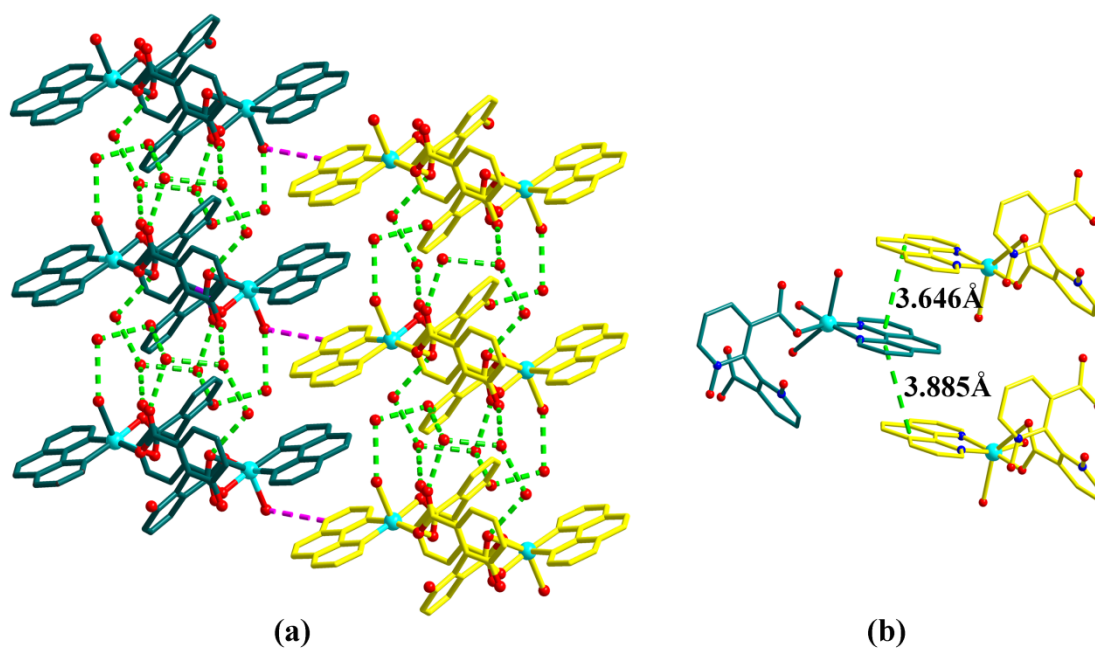

**Fig. S4** A view of 2D layer of complex **4** constructed by hydrogen bonds (O-H $\cdots$ O and C-H $\cdots$ O) and  $\pi$  $\cdots$  $\pi$  stacking interactions between two neighboring phen ligands with the centroids distance of 3.646 Å and 3.885 Å. The broken lines are on behalf of the hydrogen bonds and  $\pi$  $\cdots$  $\pi$  interactions, and the hydrogen atoms are omitted for clarity.

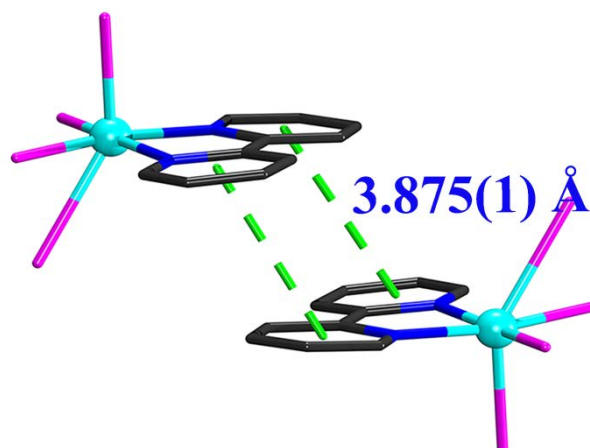

**Fig. S5** The  $\pi$ - $\pi$  stacking interactions can be seen between the 2D layers of complex **5**. The broken lines are on behalf of the  $\pi$  $\cdots\pi$  interactions, and the hydrogen atoms and (*R, S*)-bpdado ligands are omitted for clarity.

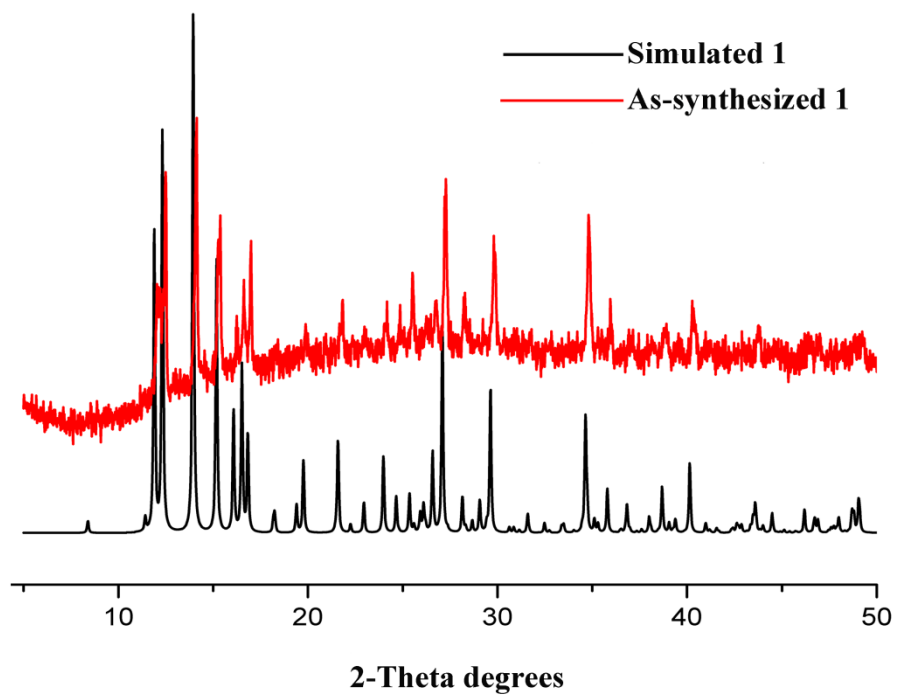



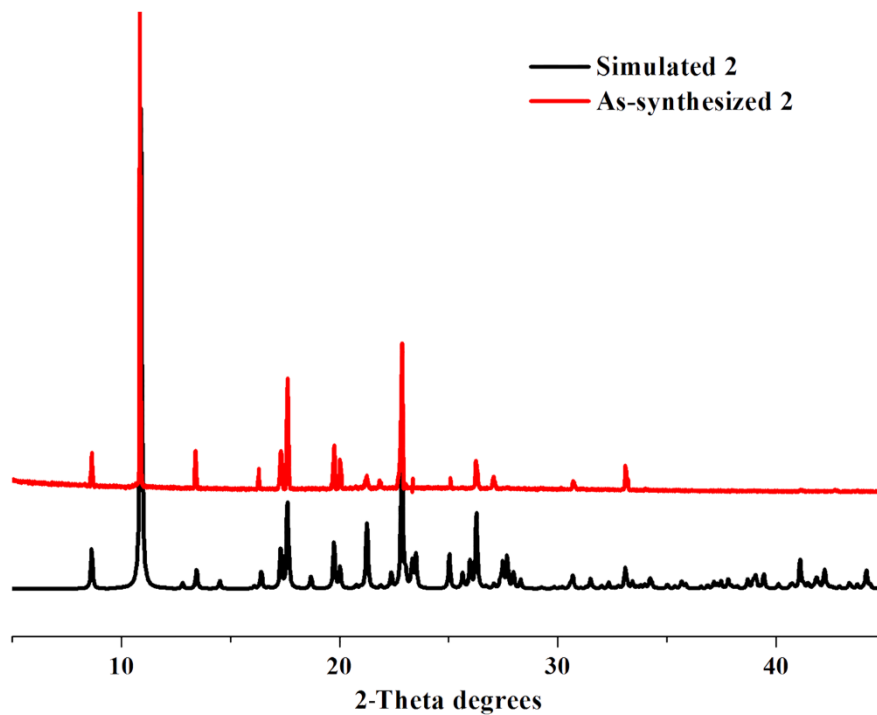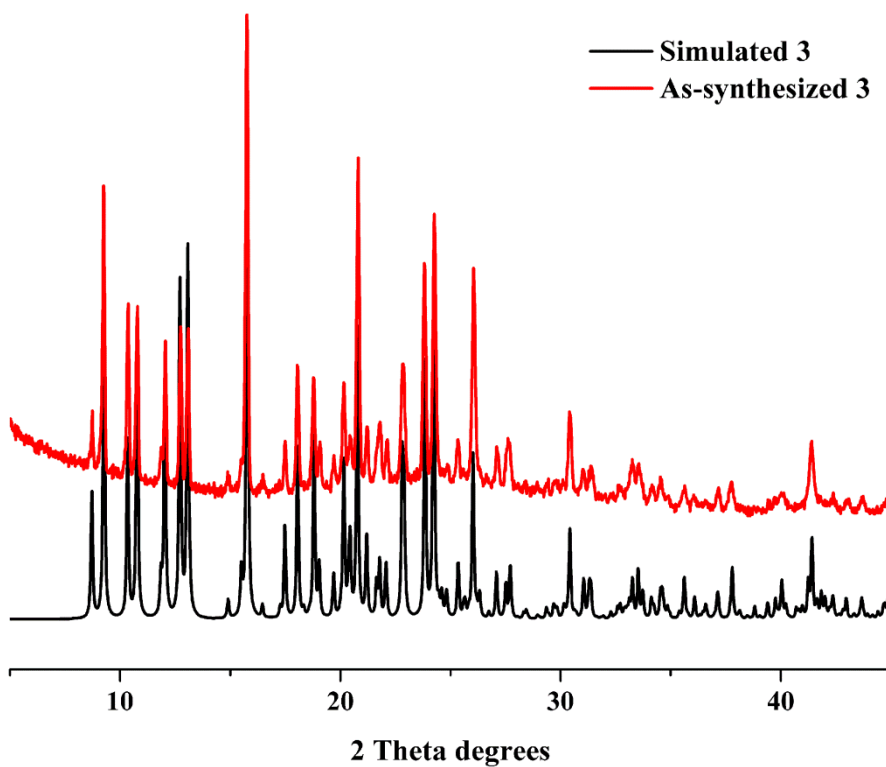

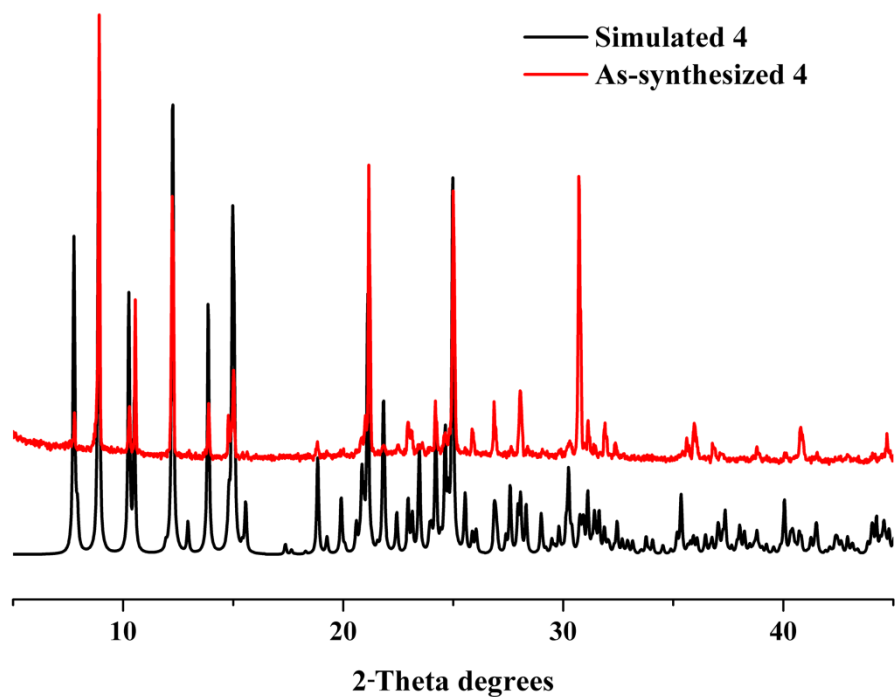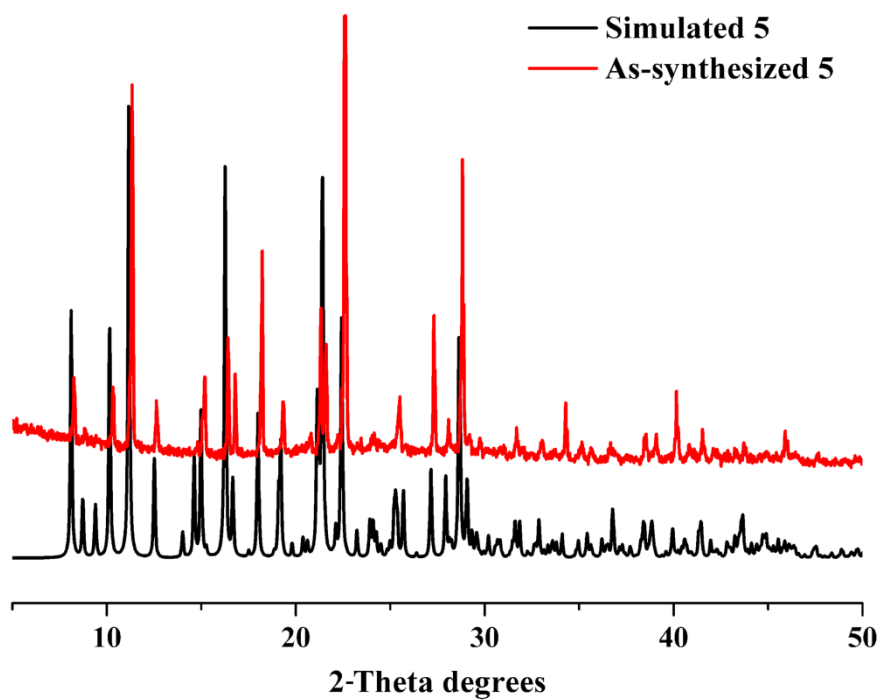

**Fig.S6** Comparisons of XRD patterns of the simulated pattern from the single-crystal structure determination and the as-synthesized products in complexes **1-5**.

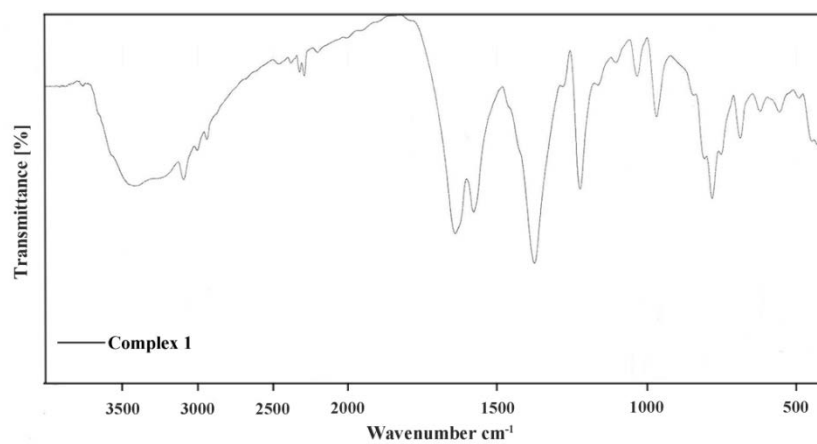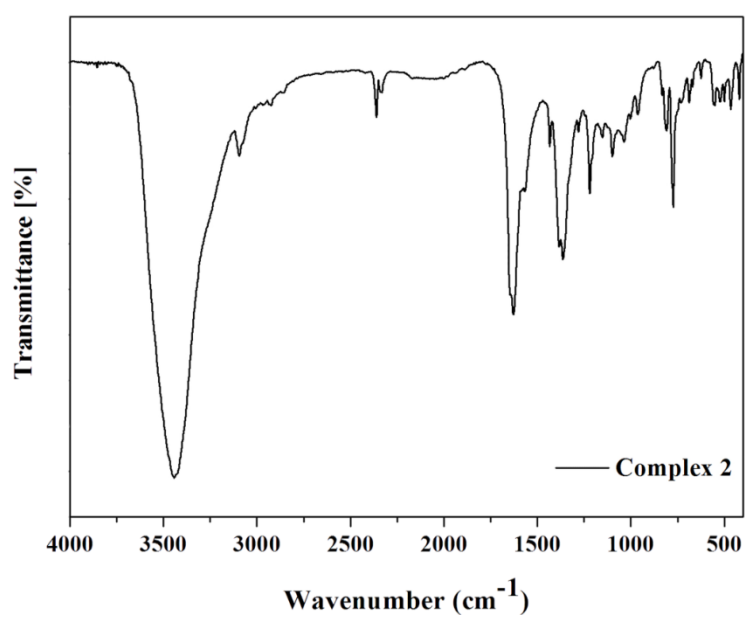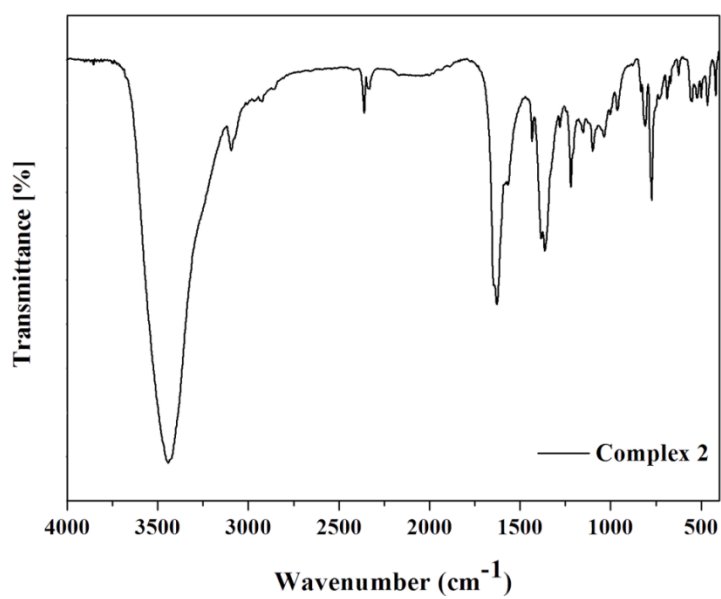

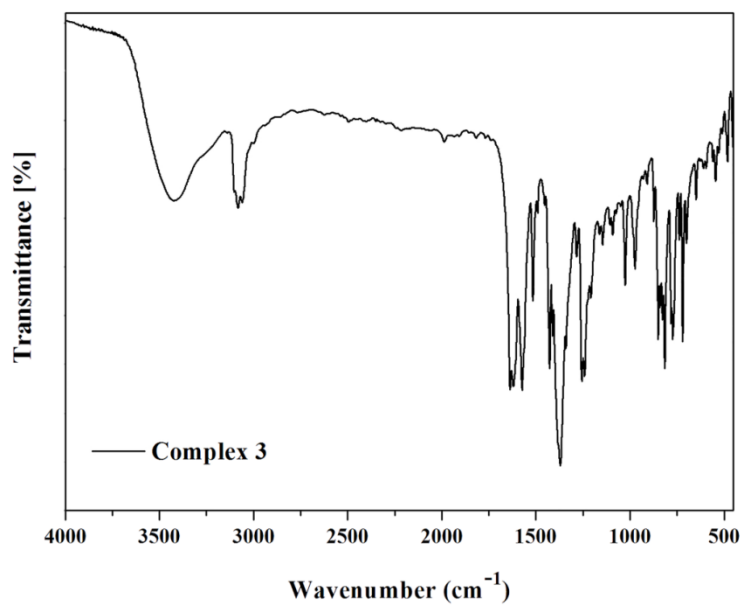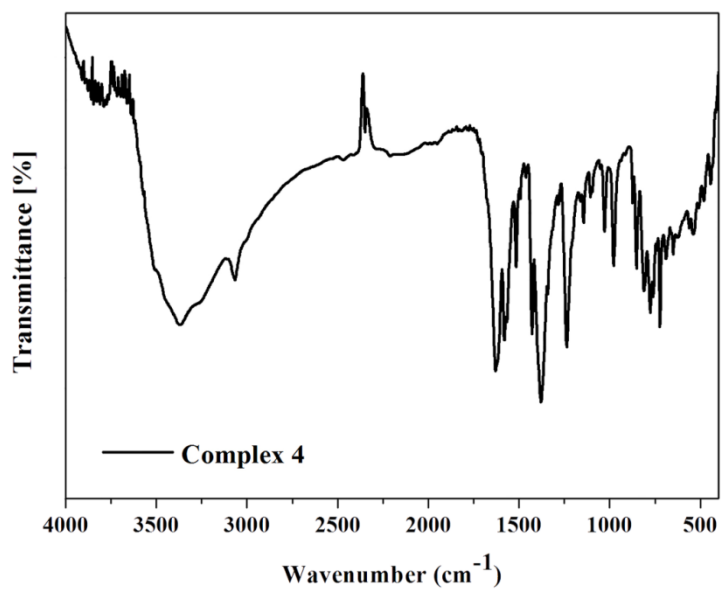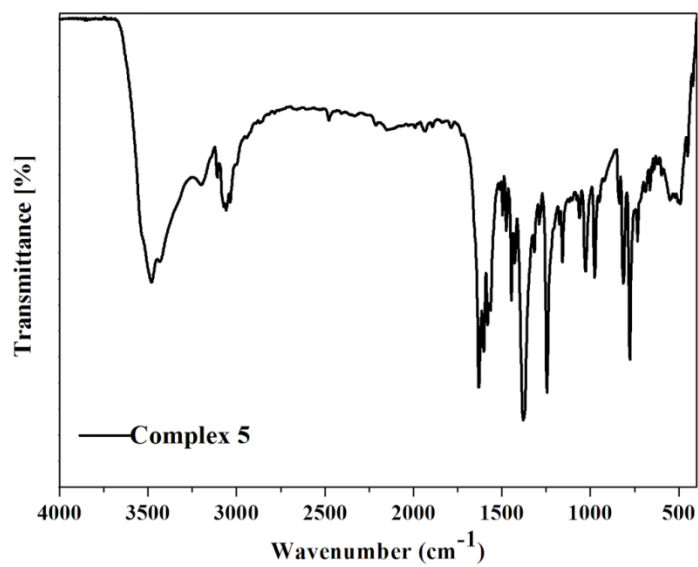

Fig.S7 IR for complexes 1-5.
